# Supplementary material for: Crystal Structure and Thermoelectric Properties of Novel Quaternary Cu2MHf3S8 (M—Mn, Fe, Co, and Ni) Thiospinels with Low Thermal Conductivity
Source: PubMed Central journal article supplement (PMC8910496; doi:10.1021/acs.chemmater.1c03593), 2022-02-15
Supplement: cm1c03593_si_005.pdf [file cm1c03593_si_005.pdf]

## *Supporting Information*

### **Crystal structure and thermoelectric properties of novel quaternary $\text{Cu}_2\text{MHf}_3\text{S}_8$ ( $M - \text{Mn, Fe, Co, Ni}$ ) thiospinels with low thermal conductivity**

Oleksandr Cherniushok<sup>1</sup>, Oleksandr V. Smitiukh<sup>2</sup>, Janusz Tobola<sup>3</sup>, Rafal Knura<sup>1</sup>,  
Oleg V. Marchuk<sup>2</sup>, Taras Parashchuk<sup>1\*</sup>, Krzysztof T. Wojciechowski<sup>1\*</sup>

<sup>1</sup>Thermoelectric Research Laboratory, Department of Inorganic Chemistry, Faculty of Materials Science and Ceramics, AGH University of Science and Technology, Mickiewicza Ave. 30, 30-059 Krakow, Poland

<sup>2</sup>Department of Chemistry and Technology, Volyn National University, Voli Ave 13, Lutsk, 43025, Ukraine

<sup>3</sup>Faculty of Physics and Applied Computer Science, AGH University of Science and Technology, Mickiewicza Ave. 30, 30-059 Krakow, Poland

\*Corresponding author(s):

Taras Parashchuk, E-mail: [parashchuk@agh.edu.pl](mailto:parashchuk@agh.edu.pl).

Krzysztof T. Wojciechowski, E-mail: [wojciech@agh.edu.pl](mailto:wojciech@agh.edu.pl)

#### **Table of contents**

**Figure S1.** Powder XRD patterns of  $\text{Cu}_2\text{MHf}_3\text{S}_8$  samples after synthesis and pellets after measurements.

**Figure S2.** Heating and cooling data of electrical conductivity (a), Seebeck coefficient (b), and thermoelectric power factor  $PF$  (c) for  $\text{Cu}_2\text{MHf}_3\text{S}_8$ .

**Figure S3.** The optical absorption spectra versus photon energy of  $\text{Cu}_2\text{MHf}_3\text{S}_8$  ( $M = \text{Mn, Fe, Co, and Ni}$ ) thiospinels at room temperature.

**Equations S1-S8.** Details of elastic properties calculations.

**Equations S9-S10.** Details of thermal transport properties calculations.

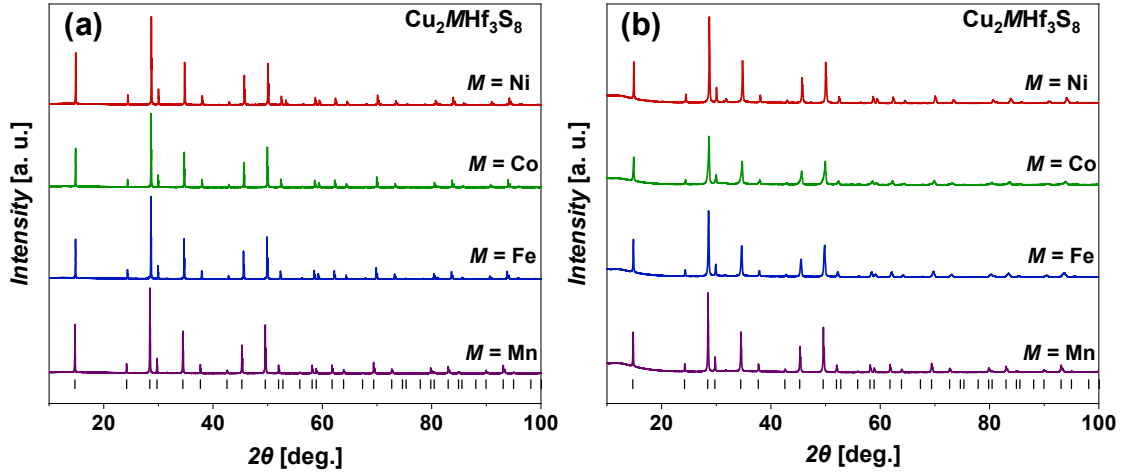

**Figure S1.** Powder XRD patterns of  $\text{Cu}_2\text{MHf}_3\text{S}_8$  samples after synthesis (a) and pellets after measurements (b).

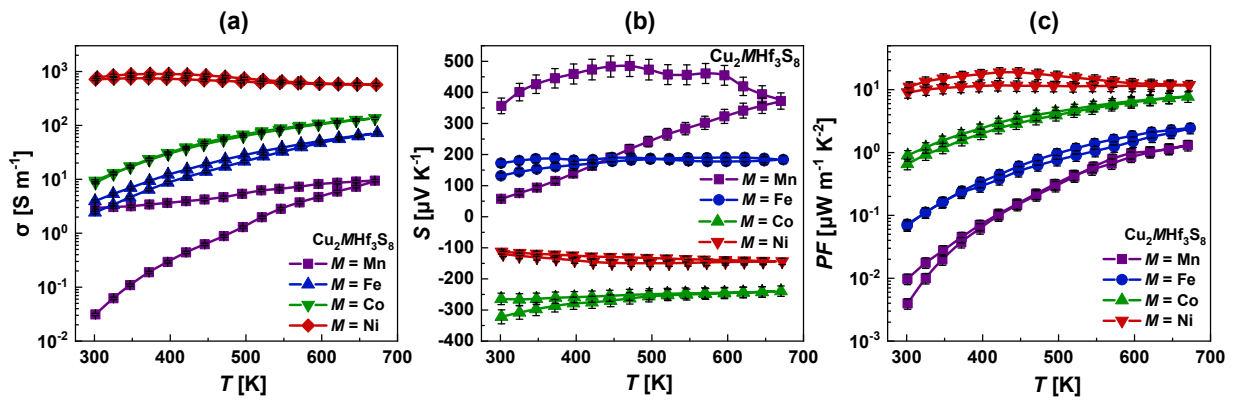

**Figure S2.** Heating and cooling data of electrical conductivity (a), Seebeck coefficient (b), and thermoelectric power factor  $PF$  (c) for  $\text{Cu}_2\text{MHf}_3\text{S}_8$ .

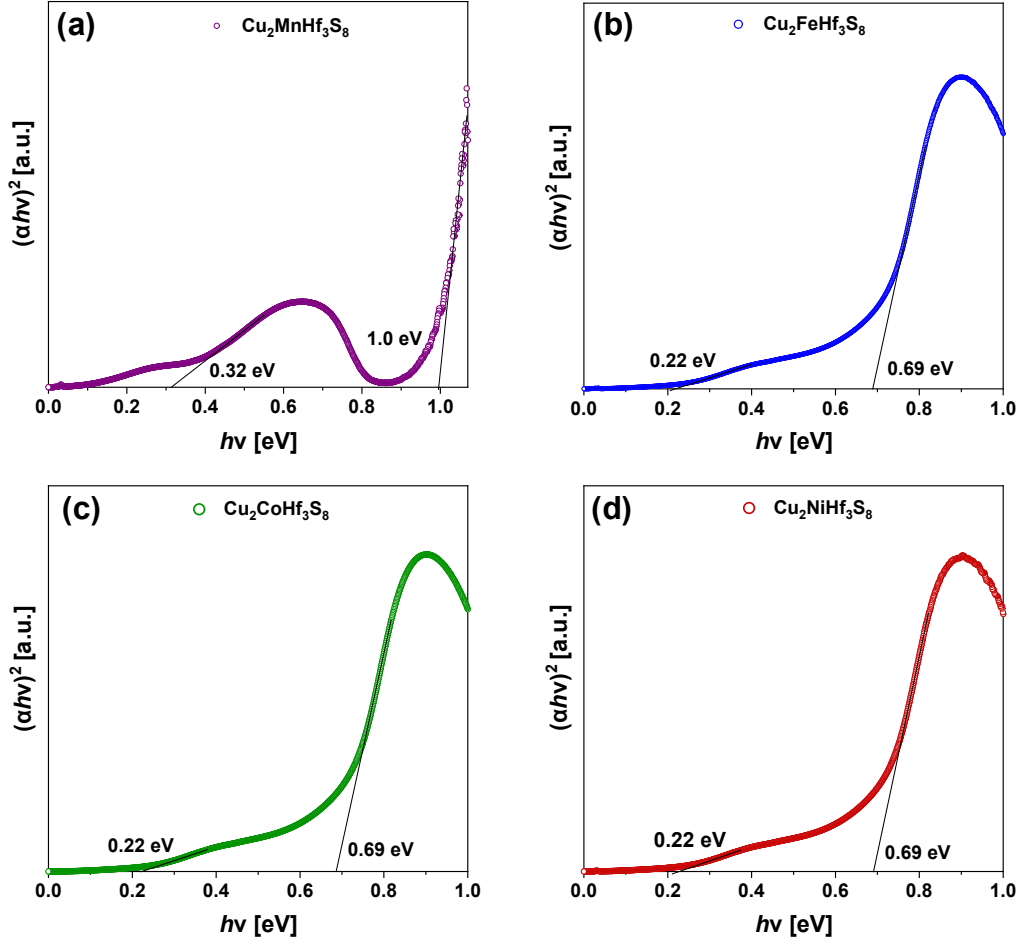

**Figure S3.** The optical absorption spectra versus photon energy of  $\text{Cu}_2\text{MHf}_3\text{S}_8$  ( $M=\text{Mn}$ ,  $\text{Fe}$ ,  $\text{Co}$ , and  $\text{Ni}$ ) thiospinels at room temperature.

### Elastic properties

The bulk modulus was calculated using the following equation [1-3]:

$$B = \rho \left( v_L^2 - \frac{4}{3} v_T^2 \right). \quad (\text{S1})$$

where  $\rho$  is the material density.

The shear modulus was calculated as:

$$G = v_T^2 \rho. \quad (\text{S2})$$

The Young's modulus is calculated as:

$$E = \frac{9BG}{3B + G}. \quad (\text{S3})$$

The Poisson's ratio is calculated as:

$$\nu = \frac{E - 2G}{2G}. \quad (\text{S4})$$

The Debye temperatures were calculated using the following expression [4]:

$$\Theta_D = \frac{h}{k_B} \left[ \frac{3n}{4\pi} \left( \frac{N_A \rho}{M} \right) \right]^{1/3} v_m, \quad (\text{S5})$$

where  $h$  is Planck's constant,  $k_B$  is Boltzmann's constant,  $N_A$  is Avogadro's number,  $M$  is the molecular weight,  $n$  is the number of atoms in the molecule, and  $v_m$  is the averaged wave velocity integrated over several crystal directions [5]:

$$v_m = \left[ \frac{1}{3} \left( \frac{2}{v_l^3} + \frac{1}{v_t^3} \right) \right]^{-1/3}, \quad (\text{S6})$$

where  $v_l$  and  $v_t$  are the longitudinal and transverse sound velocities.

### **Effect of the difference between the longitudinal and transverse speed of sound on the Grüneisen parameter**

Grüneisen parameters  $\gamma$  were calculated using the following equation [5]:

$$\gamma = \frac{3}{2} \left( \frac{1 + \nu}{2 - 3\nu} \right). \quad (\text{S7})$$

where  $\nu$  is the Poisson ratio. The square of the ratio of the longitudinal and transverse speed of sound  $\left( \frac{v_l}{v_t} \right)^2$  can be found using the following equation [5]:

$$\left( \frac{v_l}{v_t} \right)^2 = \left( \frac{2 - 2\nu}{1 - 2\nu} \right) \quad (\text{S8})$$

Let us consider that  $\alpha = \left(\frac{v_l}{v_t}\right)^2$ . Then  $\alpha$  is greater if the ratio  $v_L:v_S$  is greater. After solving the

system of equations (S7) and (S8), we obtain:  $\gamma = \frac{\frac{3}{2} + \frac{\frac{3}{2}(2-\alpha)}{2-2\alpha}}{2 - \frac{3(2-\alpha)}{2-2\alpha}}$ . After plotting the derivative  $\frac{d\gamma}{d\alpha}$

and analyzing this dependence we have found that it is an increasing function over the interval (1; 10) ( $\alpha < 1$  is not considered because it would mean that  $v_L < v_T$ , the values of  $\alpha > 10$  were not considered as  $v_L > \sqrt{10} v_T$  is very unlikely). The performed analysis indicates that  $\gamma$  increases with increasing  $\alpha$ , therefore  $\gamma$  increases with increasing  $\frac{v_l}{v_t}$  ratio.

### Thermal transport properties

From the kinetic theory, the lattice thermal conductivity is expressed as [6]:

$$\kappa_{lat} = \frac{1}{3} C_V v_m l_{ph} \quad (S9)$$

where  $\kappa_{lat}$  is experimental lattice thermal conductivity,  $C_V$  is the specific heat at constant volume,  $v_m$  is the average sound velocity. Considering this, the phonon mean free path can be calculated using the following equation [7]:

$$l_{ph} = \frac{3\kappa_{lat}}{C_V v_m} \quad (S10)$$

For the calculation of  $l_{ph}$  at 298 K, the  $\kappa_{lat}$  was assumed equal to the measured  $\kappa$  due to very low electrical conductivity ( $\sigma < 10$  S/cm), specific heat capacity was estimated using the Dulong-Petit approximation, and average sound velocity was obtained from the acoustic data of longitudinal  $v_l$  and transverse  $v_t$  sound velocities using Equation S9.

### References

- [1] Y.I. Ravich, B.A. Efimova, I.A. Smirnov, Semiconducting Lead Chalcogenides, Springer US, 1970. <https://doi.org/10.1007/978-1-4684-8607-0>.
- [2] B.M. Askerov, Electron Transport Phenomena in Semiconductors, WORLD SCIENTIFIC, 1994. <https://doi.org/10.1142/1926>.
- [3] Thermoelectrics Handbook: Macro to Nano - 1st Edition - D.M. Rowe - H, (n.d.).

- <https://www.routledge.com/Thermoelectrics-Handbook-Macro-to-Nano/Rowe/p/book/9780849322648> (accessed February 13, 2021).
- [4] O.L. Anderson, A simplified method for calculating the debye temperature from elastic constants, *J. Phys. Chem. Solids.* 24 (1963) 909–917. [https://doi.org/10.1016/0022-3697\(63\)90067-2](https://doi.org/10.1016/0022-3697(63)90067-2).
- [5] D.S. Sanditov, V.N. Belomestnykh, Relation between the parameters of the elasticity theory and averaged bulk modulus of solids, *Tech. Phys.* 56 (2011) 1619–1623. <https://doi.org/10.1134/S106378421111020X>.
- [6] T. M. Tritt, *Thermal conductivity: theory, properties, and applications*, Springer Science & Business Media, 2005.
- [7] H. Xie, S. Hao, S. Cai, T.P. Bailey, C. Uher, C. Wolverton, V.P. Dravid, M.G. Kanatzidis, Ultralow thermal conductivity in diamondoid lattices: high thermoelectric performance in chalcopyrite  $\text{Cu}_{0.8+y}\text{Ag}_{0.2}\text{In}_{1-y}\text{Te}_2$ , *Energy Environ. Sci.* 13 (2020) 3693–3705. <https://doi.org/10.1039/D0EE02323J>.
